# Supplementary material for: The Mechanoreception in Drosophila melanogaster Oocyte under Modeling Micro- and Hypergravity
Source: MDPI journal article supplement (doi:10.3390/cells12141819), 2023-07-10
Supplement: s1 [file s1]

# The mechanoreception in *Drosophila melanogaster* oocyte under modeling micro- and hypergravity

Irina V. Ogneva<sup>1,2\*</sup>

<sup>1</sup> Cell Biophysics Laboratory, State Scientific Center of the Russian Federation Institute of Biomedical Problems of the Russian Academy of Sciences, 76a, Khoroshevskoye shosse, 123007 Moscow, Russia;

<sup>2</sup> Medical and biological physics department, I. M. Sechenov First Moscow State Medical University, 8-2 Trubetskaya Street, 119991, Moscow, Russia;

\*Correspondence: [iogneva@yandex.ru](mailto:iogneva@yandex.ru), [iogneva@imbp.ru](mailto:iogneva@imbp.ru); Tel.: +7(499)195-63-98

Table S1. The stiffness (in pN/nm) of the *Drosophila melanogaster* oocytes under simulated micro- and hypergravity without or with addition agents.

| Exposure time<br>Group and conditions<br>of pre-incubation               |      | 0 min        | 30 min       | 90 min       | 210 min      |
|--------------------------------------------------------------------------|------|--------------|--------------|--------------|--------------|
| No pre-incubation                                                        | C    | 30.7 ± 1.0   | 30.8 ± 1.4   | 31.2 ± 1.2   | 29.6 ± 0.7   |
|                                                                          | s μg | 30.4 ± 1.4   | 30.6 ± 1.3   | 25.5 ± 1.2*↓ | 24.8 ± 1.2*↓ |
|                                                                          | hg   | 31.4 ± 1.0   | 26.7 ± 1.8*↓ | 27.0 ± 2.4*↓ | 29.5 ± 1.4   |
| Pre-incubation in<br>0.65% NaCl<br>without any agents<br>3 hours, RT     | C    | 31.0 ± 1.4   | 31.5 ± 0.9   | 31.3 ± 1.8   | 30.6 ± 1.6   |
|                                                                          | s μg | 30.8 ± 1.5   | 31.1 ± 1.6   | 25.8 ± 1.8*↓ | 26.2 ± 1.4*↓ |
|                                                                          | hg   | 30.6 ± 1.1   | 26.7 ± 1.7*↓ | 26.3 ± 1.4*↓ | 31.2 ± 1.1   |
| Pre-incubation in<br>0.65% NaCl<br>+ 2 μM cytochalasine B<br>3 hours, RT | C    | 30.4 ± 1.2   | 31.0 ± 1.6   | 30.5 ± 2.1   | 30.0 ± 1.1   |
|                                                                          | s μg | 30.9 ± 1.4   | 31.5 ± 1.3   | 26.0 ± 1.2*↓ | 26.3 ± 1.8*↓ |
|                                                                          | hg   | 30.4 ± 1.2   | 26.7 ± 2.1*↓ | 26.3 ± 1.4*↓ | 30.8 ± 1.6   |
| Pre-incubation in<br>0.65% NaCl<br>+ 10 μM colchicine<br>3 hours, RT     | C    | 31.1 ± 2.1   | 31.5 ± 1.1   | 30.4 ± 1.5   | 30.4 ± 1.0   |
|                                                                          | s μg | 31.1 ± 1.4   | 30.4 ± 1.2   | 25.8 ± 0.7*↓ | 26.0 ± 1.4*↓ |
|                                                                          | hg   | 31.5 ± 1.7   | 26.6 ± 2.0*↓ | 26.0 ± 1.2*↓ | 25.8 ± 0.9*↓ |
| Pre-incubation in<br>0.65% NaCl<br>+ 40mM acrylamide<br>3 hours, RT      | C    | 26.4 ± 0.8*↓ | 27.0 ± 1.4*↓ | 26.6 ± 1.4*↓ | 25.8 ± 1.2*↓ |
|                                                                          | s μg | 26.2 ± 0.9*↓ | 27.1 ± 1.2*↓ | 25.9 ± 0.8*↓ | 26.7 ± 1.1*↓ |
|                                                                          | hg   | 26.7 ± 1.2*↓ | 25.9 ± 1.2*↓ | 26.2 ± 1.2*↓ | 25.3 ± 1.2*↓ |
| Pre-incubation in<br>0.65% NaCl<br>+ 100nM calyculin A<br>3 hours, RT    | C    | 36.1 ± 1.8*↑ | 35.7 ± 1.6*↑ | 35.6 ± 1.0*↑ | 35.3 ± 1.3*↑ |
|                                                                          | s μg | 34.7 ± 1.6*↑ | 35.9 ± 1.5*↑ | 30.1 ± 1.2   | 30.2 ± 1.7   |
|                                                                          | hg   | 35.3 ± 1.4*↑ | 28.2 ± 2.0&↓ | 30.5 ± 1.1   | 30.4 ± 2.0   |

C – control, s μg – simulated microgravity, hg – hypergravity at the 2g level. RT – room temperature. \* – p < 0.05 in comparison with the according control group without any agents, & – p < 0.1 in comparison with the according control group without any agents. ↑ – increase relative to the reference value. ↓ – decrease relative to the reference value.

Table S2. The cellular respiration (in  $\text{pmol O}_2 \cdot \text{ml}^{-1} \cdot \text{min}^{-1} \cdot \text{oocyte}^{-1}$ ) of the *Drosophila melanogaster* oocytes under simulated micro- and hypergravity.

| Exposure time<br>Group |                 | 0 min          | 30 min         | 90 min         | 210 min        |
|------------------------|-----------------|----------------|----------------|----------------|----------------|
| V0                     | C               | $11.7 \pm 1.0$ | $12.0 \pm 0.4$ | $11.2 \pm 0.8$ | $10.7 \pm 1.6$ |
|                        | s $\mu\text{g}$ | $12.1 \pm 0.4$ | $12.2 \pm 0.4$ | $9.7 \pm 0.4$  | $10.3 \pm 1.2$ |
|                        | hg              | $12.2 \pm 1.6$ | $12.2 \pm 0.6$ | $10.2 \pm 1.0$ | $9.1 \pm 0.8$  |
|                        |                 |                |                |                |                |
| Vglu+mal               | C               | $16.6 \pm 1.2$ | $16.6 \pm 1.3$ | $16.0 \pm 1.8$ | $16.6 \pm 1.3$ |
|                        | s $\mu\text{g}$ | $17.7 \pm 2.0$ | $15.7 \pm 0.5$ | $14.4 \pm 1.4$ | $17.0 \pm 1.6$ |
|                        | hg              | $15.8 \pm 2.1$ | $16.9 \pm 2.0$ | $14.5 \pm 0.7$ | $13.7 \pm 1.3$ |
|                        |                 |                |                |                |                |
| Vmax                   | C               | $22.6 \pm 1.8$ | $21.3 \pm 1.6$ | $21.3 \pm 0.9$ | $21.6 \pm 2.2$ |
|                        | s $\mu\text{g}$ | $20.8 \pm 1.3$ | $20.8 \pm 1.2$ | $20.9 \pm 1.0$ | $18.9 \pm 1.9$ |
|                        | hg              | $22.6 \pm 1.3$ | $22.5 \pm 1.0$ | $19.0 \pm 1.0$ | $20.8 \pm 1.3$ |
|                        |                 |                |                |                |                |
| V(II)                  | C               | $23.6 \pm 1.3$ | $24.2 \pm 2.1$ | $23.4 \pm 2.0$ | $22.7 \pm 1.9$ |
|                        | s $\mu\text{g}$ | $22.9 \pm 2.6$ | $26.6 \pm 2.6$ | $22.9 \pm 1.1$ | $22.3 \pm 2.2$ |
|                        | hg              | $22.8 \pm 1.2$ | $24.0 \pm 1.2$ | $22.7 \pm 0.4$ | $21.7 \pm 1.1$ |
|                        |                 |                |                |                |                |
| V(IV)                  | C               | $265 \pm 16$   | $265 \pm 22$   | $277 \pm 23$   | $259 \pm 20$   |
|                        | s $\mu\text{g}$ | $284 \pm 21$   | $278 \pm 24$   | $270 \pm 12$   | $262 \pm 18$   |
|                        | hg              | $297 \pm 24$   | $287 \pm 20$   | $266 \pm 21$   | $264 \pm 28$   |

C – control, s  $\mu\text{g}$  – simulated microgravity, hg – hypergravity at the 2g level. V0 – basal oxygen absorption. Vglu+mal – oxygen absorption after supplement 10mM glutamate+5mM malate (substrates of the complex I respiratory chain). Vmax – maximal oxygen absorption after supplement 2mM ADP. V(II) – oxygen absorption after 0.5  $\mu\text{M}$  rotenone implementation (inhibitor of the complex I respiratory chain) and 10 mM succinate addition (substrate of the complex II respiratory chain). V(IV) – oxygen absorption after 5  $\mu\text{M}$  antimycin A implementation (inhibitor of the complex III respiratory chain) and 0.5 mM TMPD + 2 mM ascorbate addition (artificial substrates of the complex IV respiratory chain).
